# Supplementary material for: Chemoradiotherapy Resistance in Colorectal Cancer Cells is Mediated by Wnt/β-catenin Signaling
Source: Oxford University Press journal article supplement (doi:10.1158/1541-7786.mcr-17-0205), 2017-08-15
Supplement: 15417786mcr170205-sup-182146_2_supp_4192015_hh0czj.docx [file 15417786mcr170205-sup-182146_2_supp_4192015_hh0czj.docx]

Supplementary Table S1. Experimental conditions for cellular viability assays and dual luciferase reporter assays

| **Cell line** | **treatment** | **CTB (96 wp)**  **Cell number** | **CTB**  **transfection reagent** | **CTB (96 wp)**  **siRNA / lipid** | **DLR (12 wp)**  **cell number** | **DLR**  **transfection conditions** | **DLR (12 wp)**  **DNA** |
| --- | --- | --- | --- | --- | --- | --- | --- |
| LS1034* | siRNA | 6000 | RNAiMAX | 10 nM / 0.1 µl | n.a. | n.a. | n.a. |
|  | Renilla | n.a. | n.a. | n.a. | 150,000 | X-tremeGENE HP | 50 ng |
|  | SuperFOP*Flas*h | n.a. | n.a. | n.a. | 150,000 | X-tremeGENE HP | 1 µg |
|  | SuperTOP*Flash* | n.a. | n.a. | n.a. | 150,000 | X-tremeGENE HP | 1 µg |
| SW480* | siRNA | 3000 | HiPerFect | 3.3 nM / 0.2 µl | n.a. | n.a. | n.a. |
|  | DMSO / XAV-939 | 3000 | n.a. | n.a. | n.a. | n.a. | n.a. |
|  | Renilla | n.a. | n.a. | n.a. | 150,000 | X-tremeGENE HP | 50 ng |
|  | SuperFOP*Flas*h | n.a. | n.a. | n.a. | 150,000 | X-tremeGENE HP | 250 ng |
|  | SuperTOP*Flash* | n.a. | n.a. | n.a. | 150,000 | X-tremeGENE HP | 250 ng |
| SW837** | siRNA | 6000 | HiPerFect | 3.3 nM / 0.2 µl | n.a. | n.a. | n.a. |
|  | DMSO / XAV-939 | 6000 | n.a. | n.a. | n.a. | n.a. | n.a. |
|  | Renilla | n.a. | n.a. | n.a. | 1,000,000 | Amaxa, V-Kit, T-30 | 50 ng |
|  | SuperFOP*Flas*h | n.a. | n.a. | n.a. | 1,000,000 | Amaxa, V-Kit, T-30 | 250 ng |
|  | SuperTOP*Flash* | n.a. | n.a. | n.a. | 1,000,000 | Amaxa, V-Kit, T-30 | 250 ng |
| SW1463** | Renilla | n.a. | n.a. | n.a. | 100,000 | X-tremeGENE HP | 50 ng |
|  | SuperFOP*Flas*h | n.a. | n.a. | n.a. | 100,000 | X-tremeGENE HP | 500 ng |
|  | SuperTOP*Flash* | n.a. | n.a. | n.a. | 100,000 | X-tremeGENE HP | 500 ng |
| SW1463RES** | Renilla | n.a. | n.a. | n.a. | 150,000 | X-tremeGENE HP | 50 ng |
|  | SuperFOP*Flas*h | n.a. | n.a. | n.a. | 150,000 | X-tremeGENE HP | 500 ng |
|  | SuperTOP*Flash* | n.a. | n.a. | n.a. | 150,000 | X-tremeGENE HP | 500 ng |
| RPE*** | Renilla | n.a. | n.a. | n.a. | 75,000 | X-tremeGENE HP | 50 ng |
|  | SuperFOP*Flas*h | n.a. | n.a. | n.a. | 75,000 | X-tremeGENE HP | 1 µg |
|  | SuperTOP*Flash* | n.a. | n.a. | n.a. | 75,000 | X-tremeGENE HP | 1 µg |
| RPE-EV/S33Y*** | Renilla | n.a. | n.a. | n.a. | 75,000 | X-tremeGENE HP | 50 ng |
|  | SuperFOP*Flas*h | n.a. | n.a. | n.a. | 75,000 | X-tremeGENE HP | 1 µg |
|  | SuperTOP*Flash* | n.a. | n.a. | n.a. | 75,000 | X-tremeGENE HP | 1 µg |

* colon cancer cell line, ** rectal cancer cell line, *** normal retina epithelial cell line, CTB = cell titer blue, DLR = dual luciferase assay, n.a. = not applicable, EV = empty vector, S33Y = mutated β-catenin (S33Y), RES = radiation resistant (68 Gy)
